# Supplementary material for: The Marine Natural Compound Dragmacidin D Selectively Induces Apoptosis in Triple-Negative Breast Cancer Spheroids
Source: MDPI journal article supplement (doi:10.3390/md21120642), 2023-12-15

**Figure S1.** Lack of autofluorescence at 24h and markers of late apoptosis seen with treatment of TNBC spheroids with dragmacidin D with 48h and 72h incubations. **(a)** Representative images of one experiment in MDA-MB-231 cells treated with dragmacidin D for 24h without staining mix showing dragmacidin D has no autofluorescence and **(b)** Representative images of one experiment MDA-MB-468 cells treated with dragmacidin D for 48 or 72h with staining mix showing cells exhibiting markers of late apoptosis and cell death (loss of membrane integrity and decrease in cell number) with **(c)** graphs for both cell lines of 48h and 24h data. Pictures were taken at 10X magnification. Scale bar is 200  $\mu\text{m}$ . Blue: nuclei (Hoechst 33342), Red: loss of membrane integrity (7-aminoactinomycin D), Green: cleaved caspase 3/7

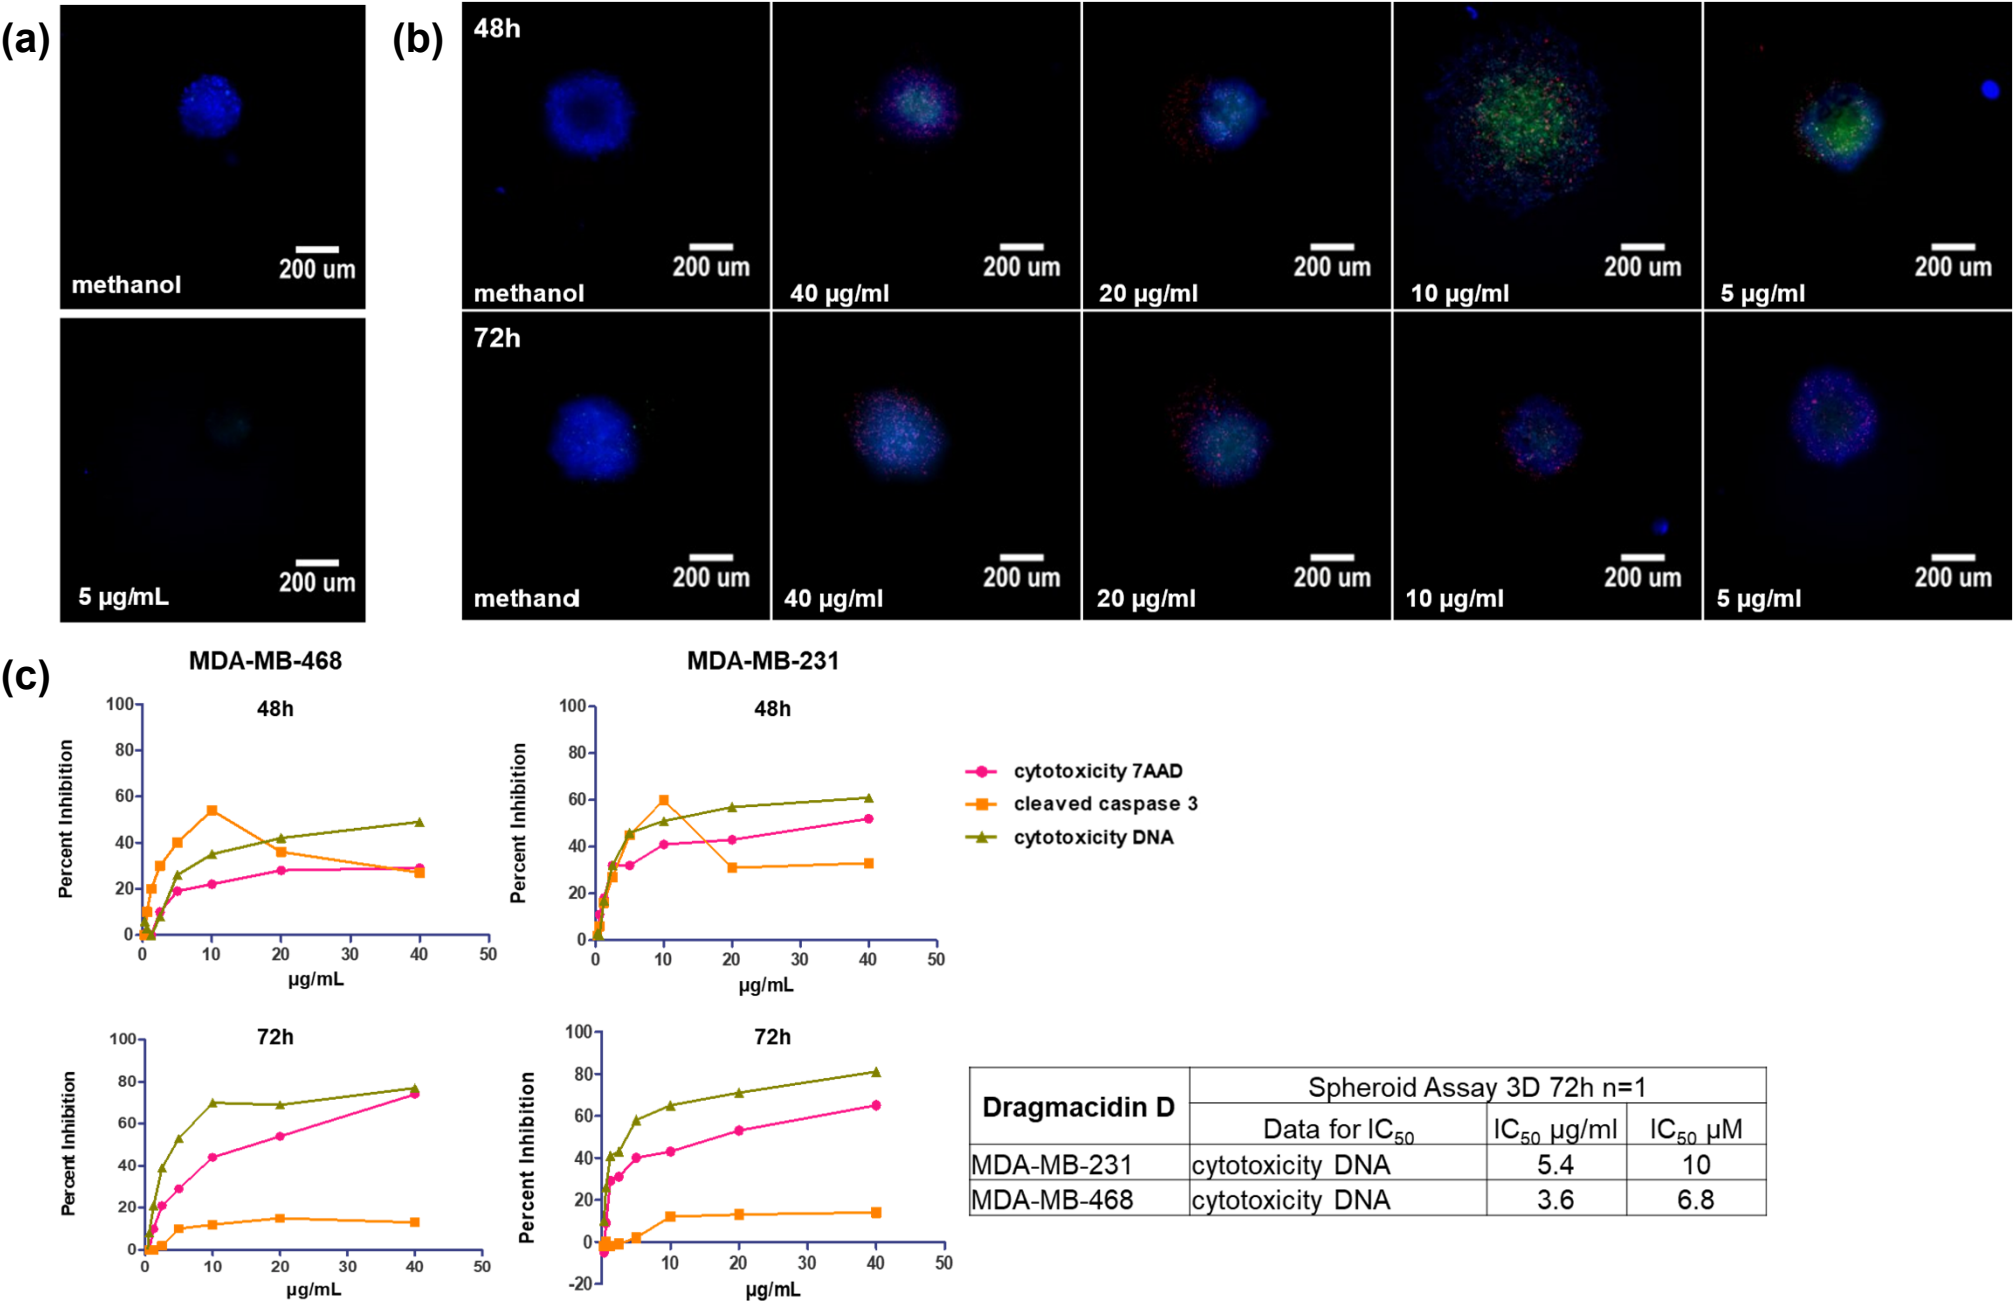

**Figure S2.** Synergy testing in MDA-MB-231 and graphs for decrease in cell number and loss of membrane integrity for MDA-MB-468. **(a)** Representative images of one synergy experiment in MDA-MB-231 cells, and average graphs of 3 experiments for decrease in cell number and 7AAD measurements in **(b)** MDA-MB-231 and **(c)** MDA-MB-468 cells. Pictures were taken at 10X magnification. Scale bar is 200  $\mu\text{m}$ . Statistical analysis was performed using a Student's t-test where significance was determined with  $p \leq 0.05$ .

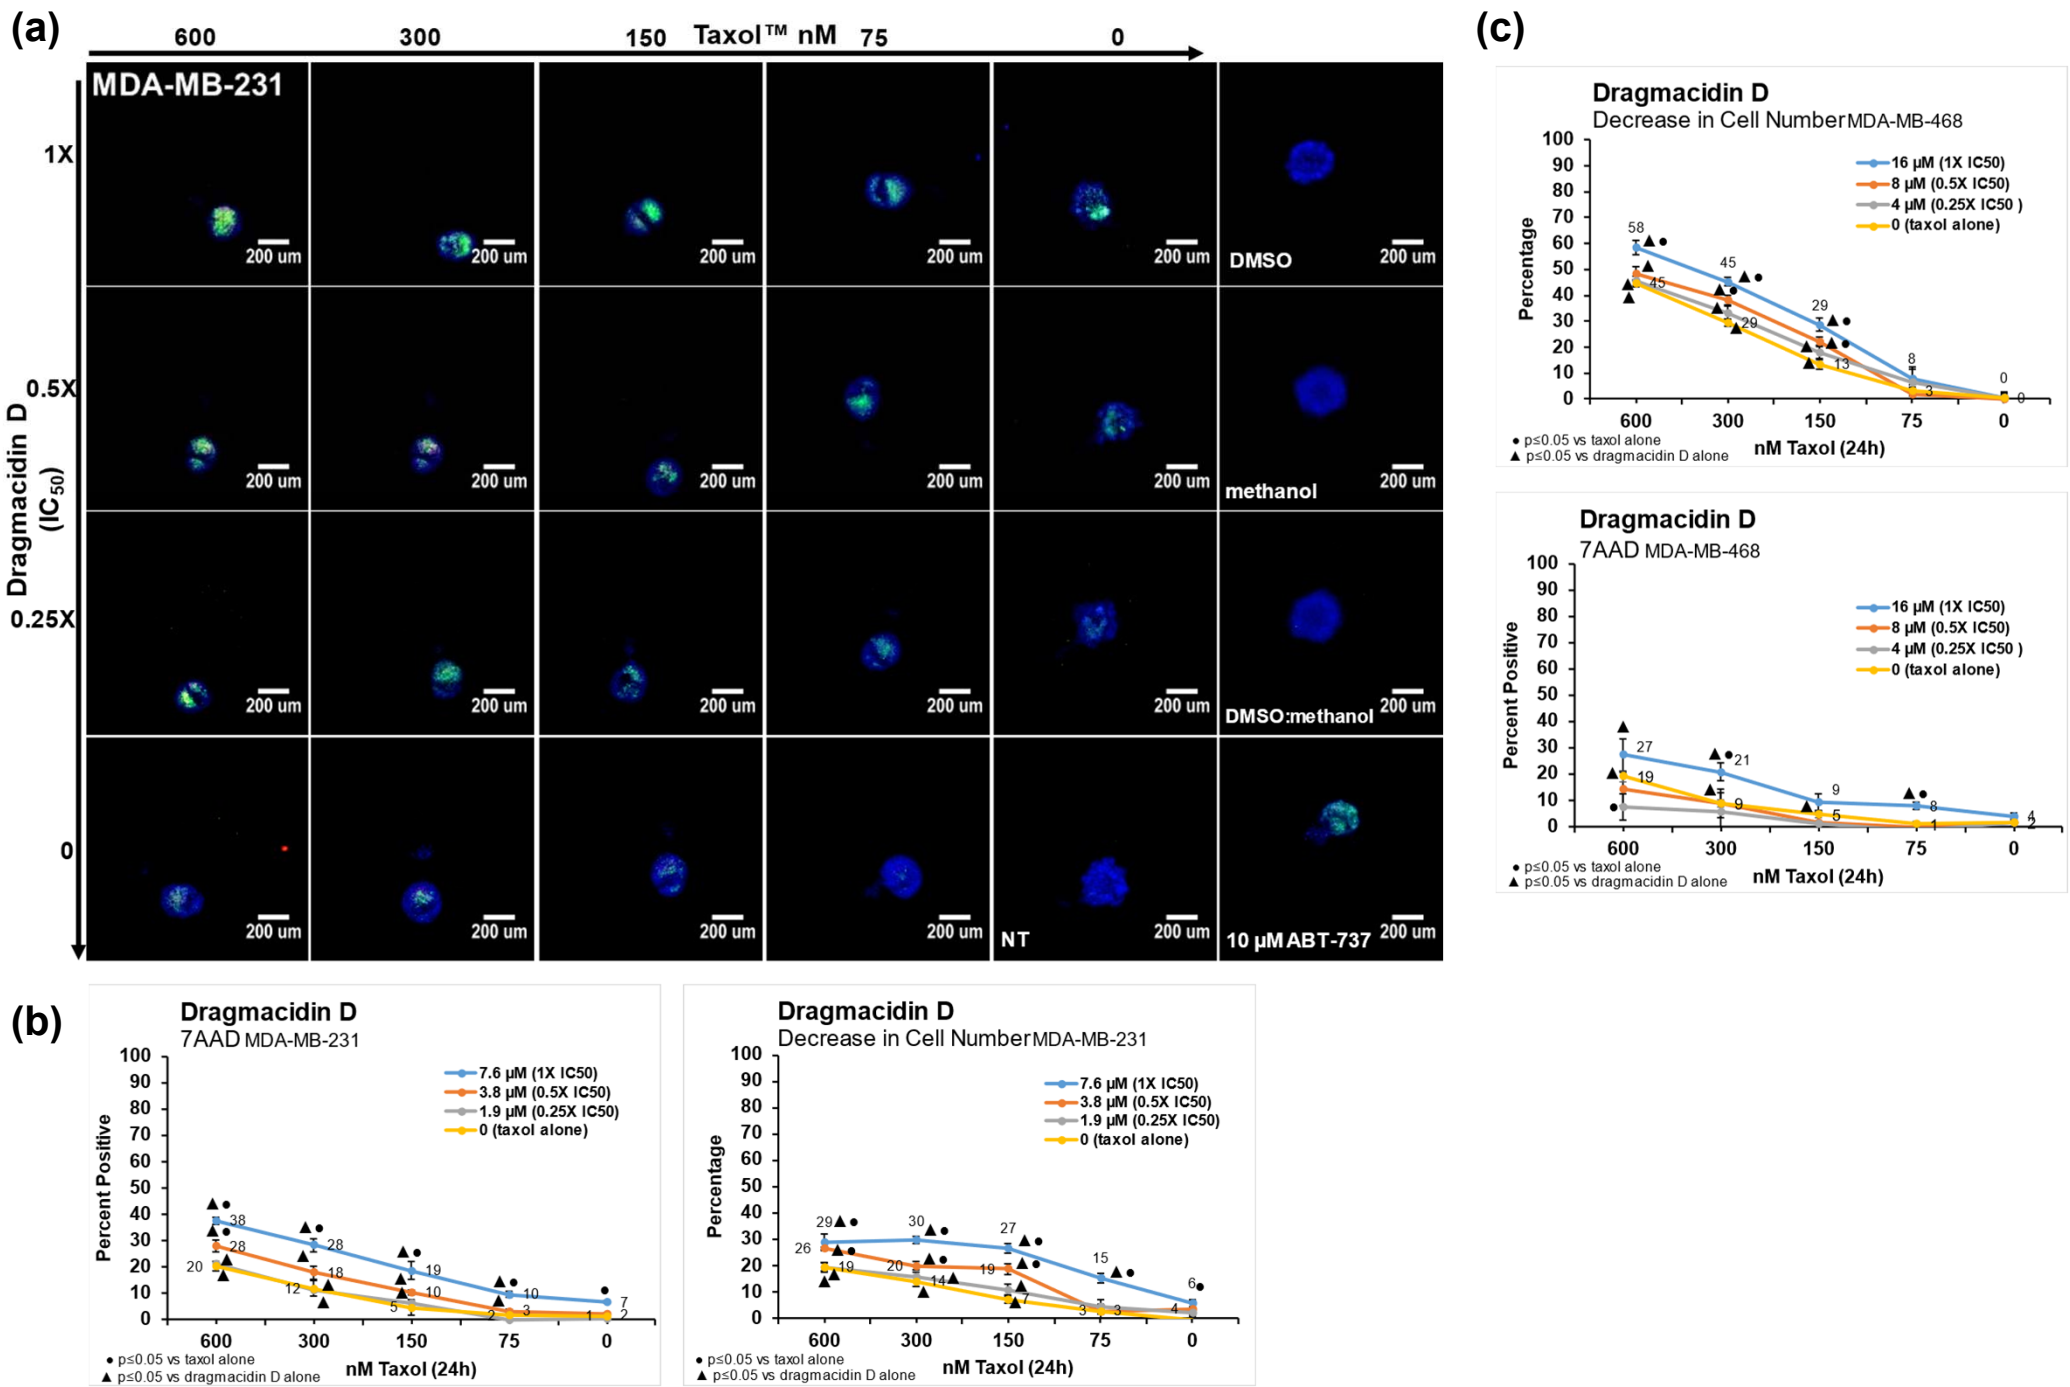

**Figure S3.** Differential protein expression of dragmacidin D treated spheroids compared to solvent control treated spheroids for proteins of the PI3K/Akt/mTOR pathway represented in the RPPA array. The graphs represent the average of 3 independent experiments  $\pm$  standard error of the mean.

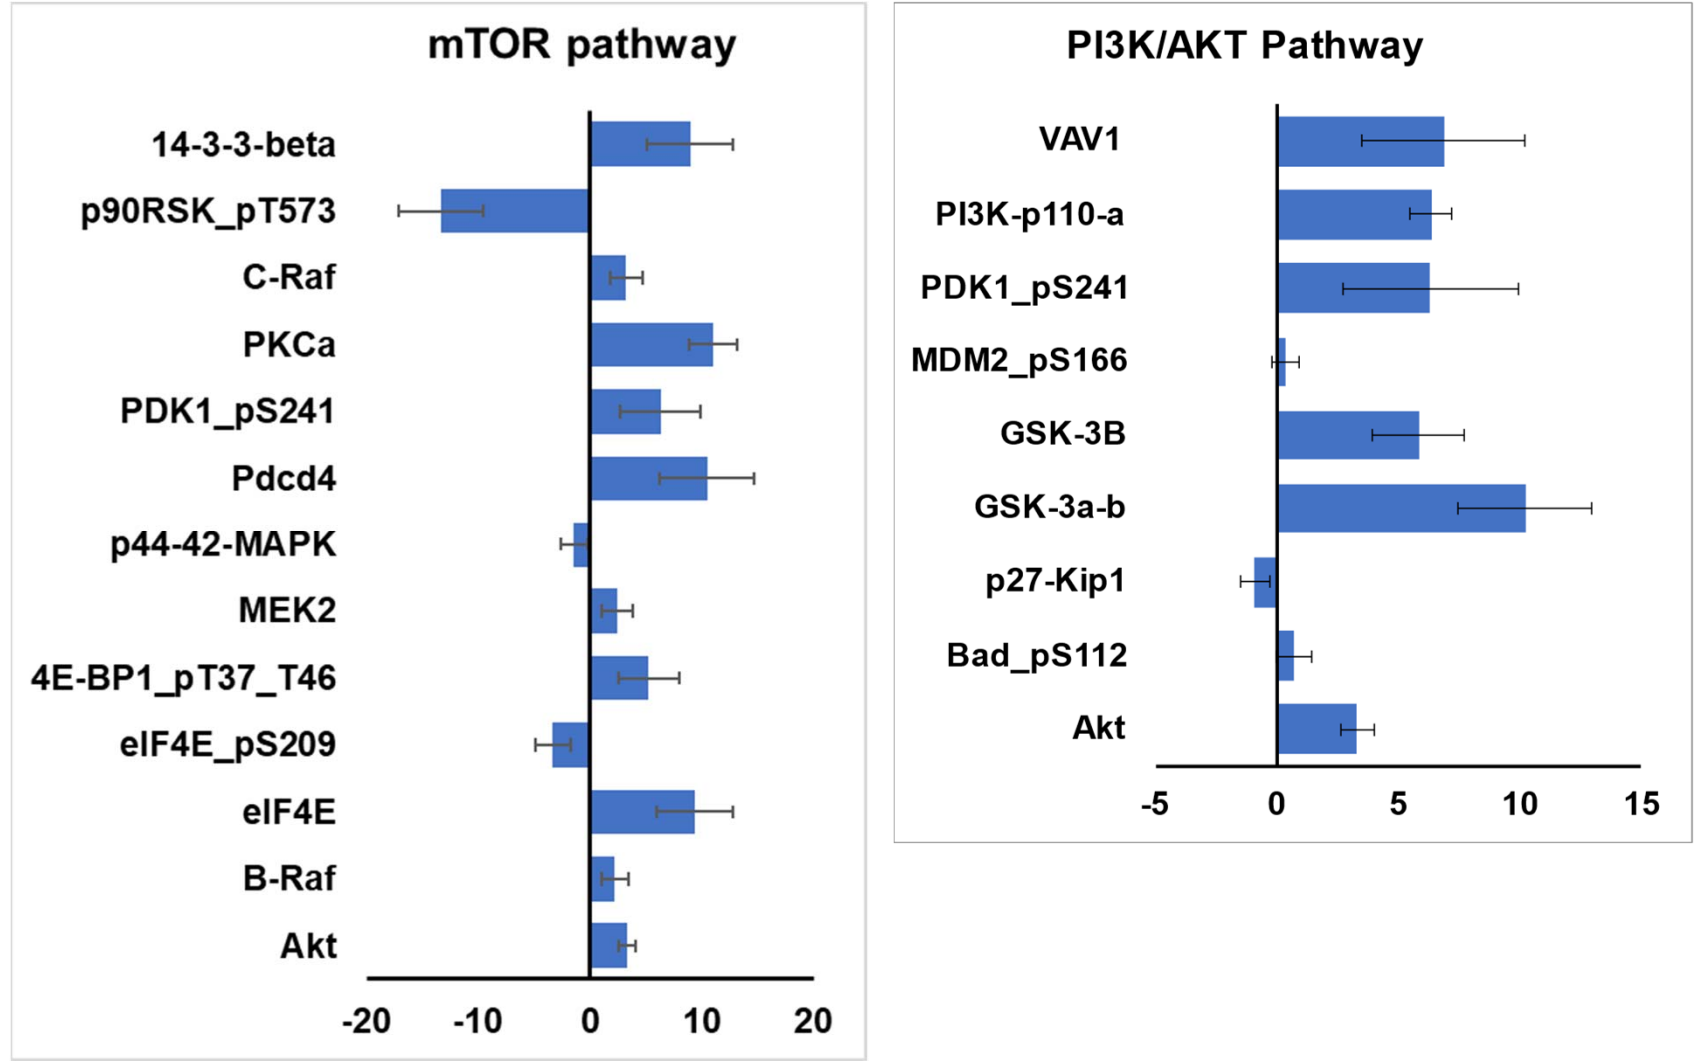

**Figure S4.**  $^1\text{H}$  NMR spectrum of dragmacidin D used in the study. ( $d_4$ -methanol, 600 MHz)

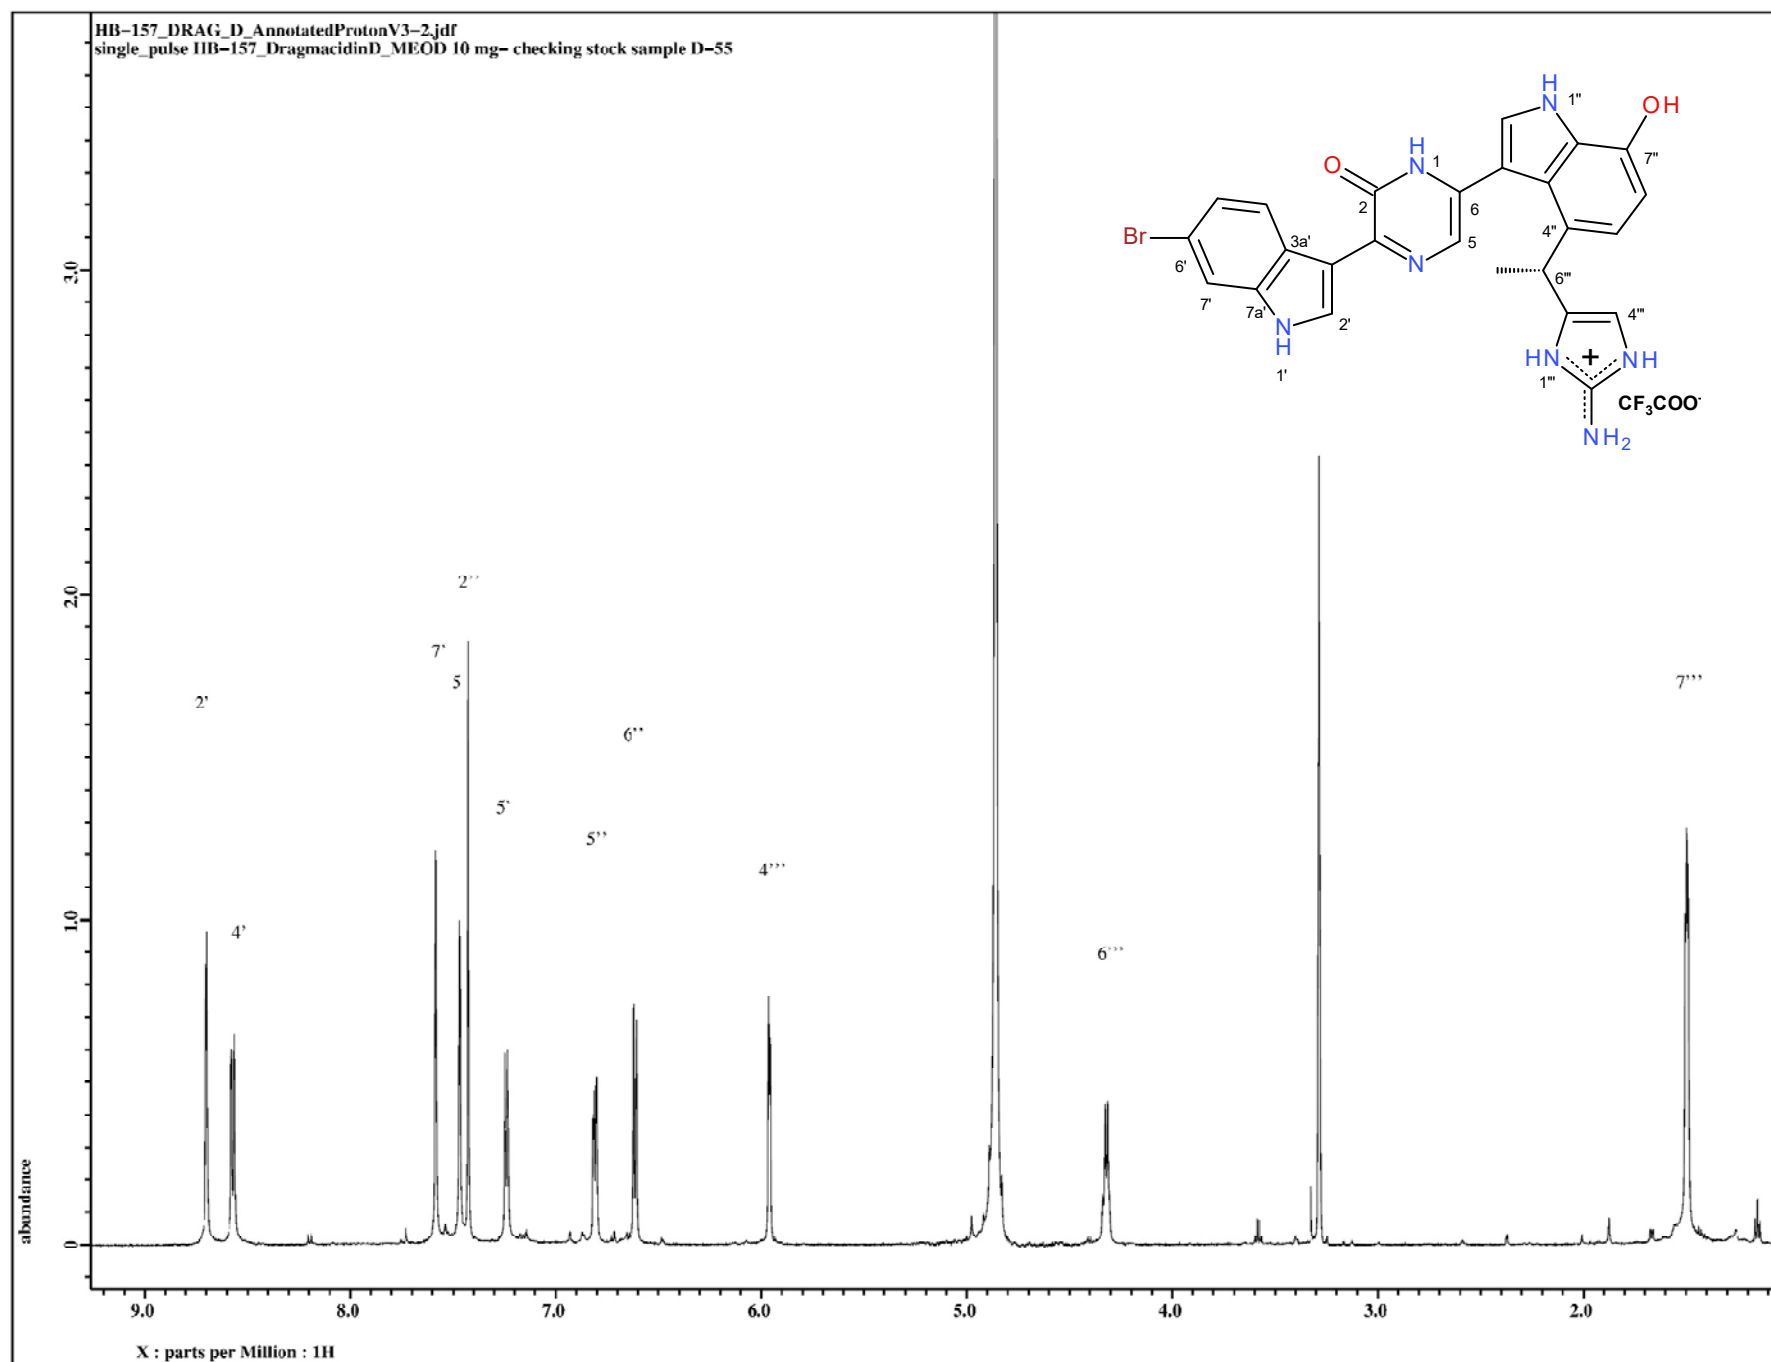

**Figure S5.**  $^{13}\text{C}$  NMR spectrum of dragmacidin D used in the study. ( $d_4$ -methanol, 150 MHz)

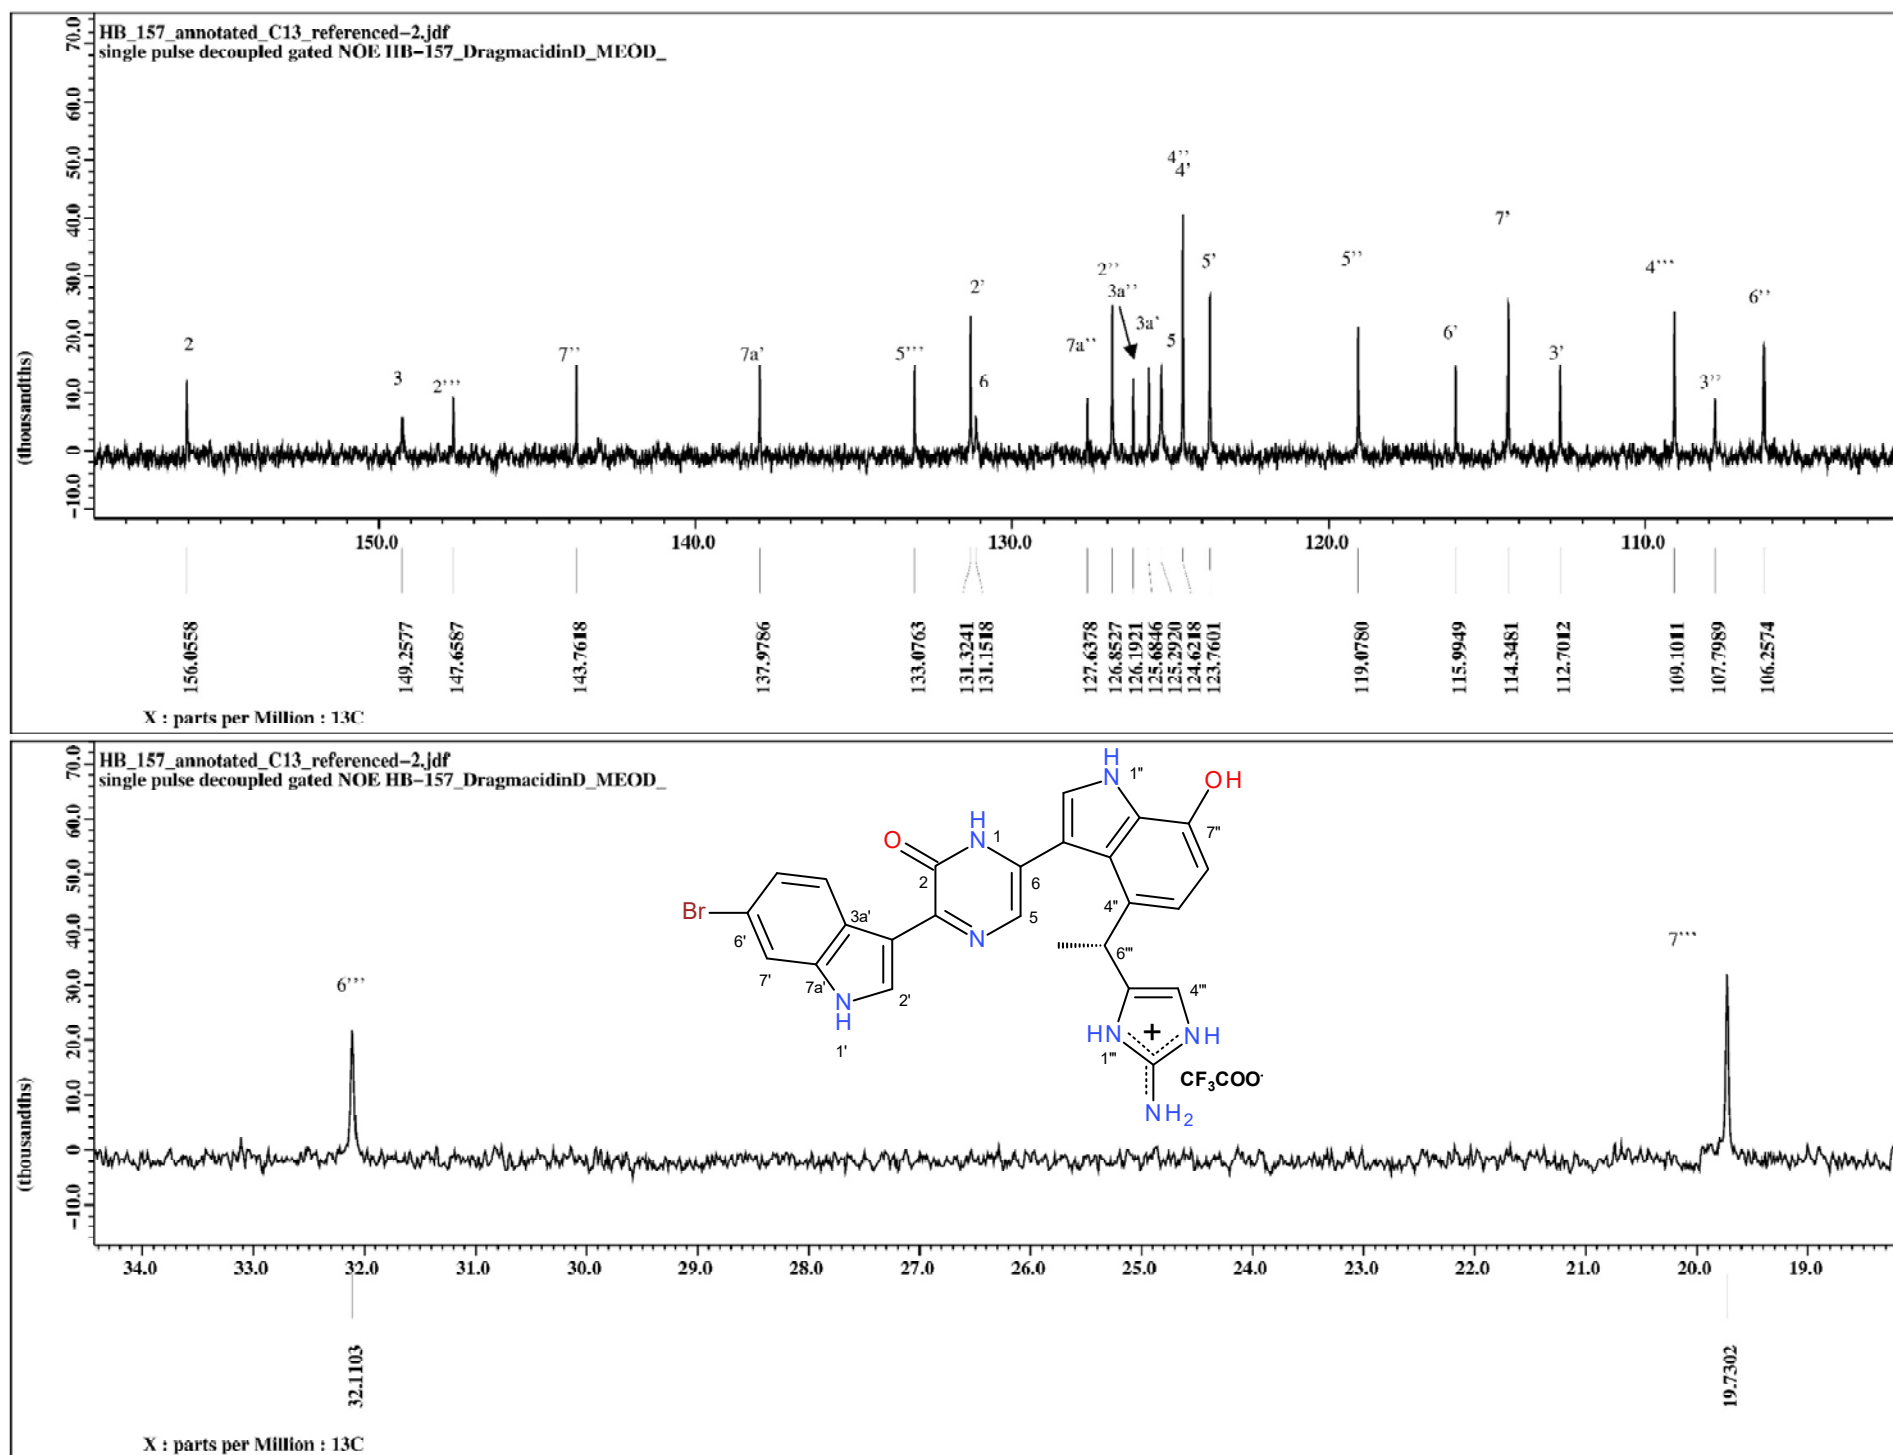

**Figure S6.** Direct infusion ESI + mode mass spectrum of dragmacidin d used in the study.

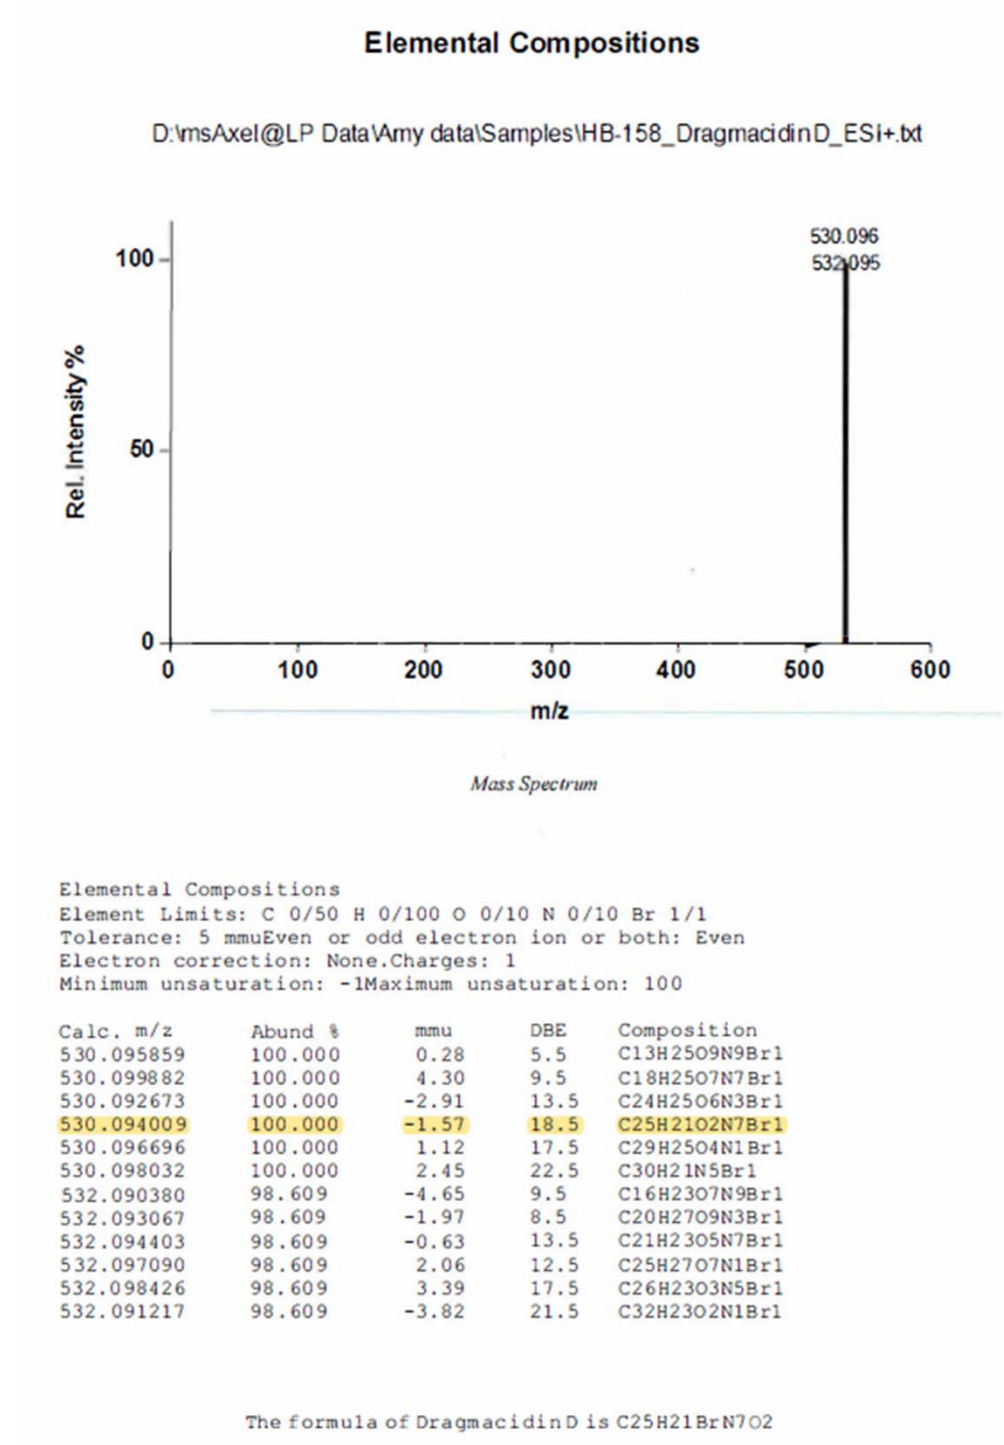

Supplement: s1 [file s1]
